# Supplementary material
Source: MDPI journal article supplement (https://www.mdpi.com/2073-4441/13/22/3221)
Supplement: s1 [file s1]

# Biochemical Composition of Seston Reflecting the Physiological Status and Community Composition of Phytoplankton in a Temperate Coastal Embayment of Korea

Riaz Bibi, Hee Yoon Kang, Dongyoung Kim, Jaebin Jang, Changseong Kim, Goutam Kumar Kundu and Chang-Keun Kang \*

School of Earth Sciences and Environmental Engineering, Gwangju Institute of Science and Technology, Gwangju 61005, Korea

\* Correspondence: to: ckkang@gist.ac.kr

## Supplementary Information Contents

**Supplementary Table S1.** Distributions of temperature, salinity, dissolved inorganic nitrogen ( $\text{NH}_4^+$ ,  $\text{NO}_2^-$ ,  $\text{NO}_3^-$ ), silicate ( $\text{SiO}_2$ ), and phosphate ( $\text{PO}_4^{3-}$ ) in Gwangyang Bay during the study period.

**Supplementary Table S2.** Distributions of suspended particulate matter (SPM), phytoplankton biomass (Chl $a$ ), particulate organic carbon (POC) and nitrogen (PON) concentrations, and molar POC:PN ratio (C:N), Primary Productivity (PP), carbon and nitrogen stable isotope ratio values ( $\delta^{13}\text{C}_{\text{POM}}$  and  $\delta^{15}\text{N}_{\text{POM}}$ ) in Gwangyang Bay during the study period.

**Supplementary Table S3.** The concentrations of biochemical compounds (carbohydrates: CHO, proteins: PRT, lipids: LIP), biopolymeric carbon (PBC), their ratios (PRT:CHO, CHO:LIP, and POC:Chl $a$ ) of seston at nine selected stations in Gwangyang Bay during the study period.

**Supplementary Table S4.** Output marker pigment:chlorophyll  $a$  ratio for phytoplankton groups as calculated by CHEMTAX in each cluster in Gwangyang Bay based on the self-organizing map. DIAT, diatoms; DINO, dinoflagellates; CRYP, cryptophytes; PELA, pelagophytes; PRYM, Prymnesiophytes; CHLO, chlorophytes; CYAN, cyanobacteria; PRAS, prasinophytes.

**Supplementary Table S5.** The generalized additive models (GAMs) analysis of phytoplankton community composition and biochemical components of seston measured in Gwangyang Bay. Bold values indicate that correlation is significant at  $p < 0.05$ .

**Supplementary Figure S1.** Visualization of physical and biogeochemical variables on trained Self Organizing Map units.

**Table S1.** Distributions of temperature, salinity, dissolved inorganic nitrogen ( $\text{NH}_4^+$ ,  $\text{NO}_2^-$ ,  $\text{NO}_3^-$ ), silicate ( $\text{SiO}_2$ ), and phosphate ( $\text{PO}_4^{3-}$ ) in Gwangyang Bay during the study period.

| Date.          | Station | T<br>(°C) | Salinity | $\text{NH}_4^+$<br>μM | $\text{NO}_2^-$<br>μM | $\text{NO}_3^-$<br>μM | $\text{SiO}_2$<br>μM | $\text{PO}_4^{3-}$<br>μM |
|----------------|---------|-----------|----------|-----------------------|-----------------------|-----------------------|----------------------|--------------------------|
| Spring<br>2017 | S1      | 24.8      | 8.0      | 0.4                   | 0.3                   | 20                    | 46.4                 | 0.0                      |
|                | S2      | 23.8      | 16.9     | 0.6                   | 0.2                   | 4.6                   | 28.5                 | 0.1                      |
|                | S3      | 27.6      | 23.3     | 1.2                   | 0.3                   | 4.1                   | 19.6                 | 0.7                      |
|                | S4      | 21.5      | 31.9     | 0.7                   | 0.2                   | 2.6                   | 10.2                 | 0.4                      |
|                | S5      | 21.0      | 31.9     | 0.8                   | 0.2                   | 2.2                   | 9.8                  | 0.4                      |
|                | S6      | 20.8      | 32.1     | 0.5                   | 0.2                   | 2.9                   | 11.1                 | 0.3                      |
|                | S7      | 19.9      | 32.1     | 0.3                   | 0.0                   | 1.3                   | 8.5                  | 0.1                      |
|                | S8      | 19.6      | 32.2     | 0.4                   | 0.0                   | 1.1                   | 6.9                  | 0.1                      |
|                | S9      | 19.1      | 32.4     | 0.3                   | 0.0                   | 1.2                   | 7.0                  | 0.1                      |
| Summer<br>2017 | S1      | 26.7      | 0.1      | 0.2                   | 0.2                   | 115.8                 | 153.9                | 1.2                      |
|                | S2      | 27.8      | 4.5      | 1.7                   | 0.6                   | 107.9                 | 137.4                | 2.0                      |
|                | S3      | 28.8      | 10.3     | 2.0                   | 1.1                   | 89.2                  | 112.4                | 1.9                      |
|                | S4      | 28.2      | 21.9     | 0.9                   | 1.7                   | 37.5                  | 67.2                 | 1.1                      |
|                | S5      | 27.7      | 26.2     | 0.4                   | 1.3                   | 12.6                  | 34.1                 | 0.0                      |
|                | S6      | 27.3      | 29.2     | 0.3                   | 0.1                   | 1.7                   | 2.3                  | 0.0                      |
|                | S7      | 26.8      | 29.8     | 0.1                   | 0.2                   | 1.3                   | 2.2                  | 0.0                      |
|                | S8      | 26.7      | 29.6     | 0.1                   | 0.0                   | 1.4                   | 1.0                  | 0.0                      |
|                | S9      | 27.0      | 30.8     | 0.3                   | 0.0                   | 1.5                   | 1.9                  | 0.0                      |
| Fall<br>2017   | S1      | 8.3       | 4.8      | 0.7                   | 0.2                   | 83.8                  | 24.8                 | 0.2                      |
|                | S2      | 11.1      | 20.9     | 1.3                   | 0.8                   | 48.8                  | 45.5                 | 1.0                      |
|                | S3      | 12.2      | 25.8     | 1.9                   | 0.4                   | 14.5                  | 20.6                 | 1.0                      |
|                | S4      | 13.7      | 30.4     | 2.7                   | 1.0                   | 10.1                  | 25.1                 | 1.3                      |
|                | S5      | 14.2      | 31.3     | 1.8                   | 1.0                   | 5.6                   | 16.4                 | 1.0                      |
|                | S6      | 13.7      | 31.4     | 1.8                   | 1.2                   | 7.3                   | 19.6                 | 1.0                      |
|                | S7      | 13.9      | 31.5     | 1.0                   | 0.9                   | 4.7                   | 13.5                 | 0.8                      |
|                | S8      | 14.2      | 31.8     | 0.5                   | 0.4                   | 2.8                   | 7.2                  | 0.4                      |
|                | S9      | 14.9      | 32.3     | 0.4                   | 0.8                   | 4.6                   | 12.4                 | 0.4                      |
| Winter<br>2018 | S1      | 3.1       | 0.0      | 0.5                   | 0.4                   | 44.4                  | 28                   | 0.1                      |
|                | S2      | 4.6       | 18.8     | 0.4                   | 0.4                   | 37.4                  | 25.2                 | 0.1                      |
|                | S3      | 6.6       | 32.8     | 0.3                   | 0.1                   | 4.1                   | 2.2                  | 0.0                      |
|                | S4      | 6.9       | 34.1     | 0.4                   | 0.0                   | 1.2                   | 0.2                  | 0.1                      |
|                | S5      | 7.0       | 34.2     | 0.2                   | 0.0                   | 1.7                   | 0.3                  | 0.1                      |
|                | S6      | 7.6       | 34.8     | 0.3                   | 0.0                   | 1.3                   | 0.5                  | 0.1                      |
|                | S7      | 8.2       | 35.2     | 0.4                   | 0.0                   | 1.5                   | 1.0                  | 0.2                      |
|                | S8      | 8.2       | 35.3     | 0.3                   | 0.0                   | 1.8                   | 1.3                  | 0.2                      |
|                | S9      | 8.2       | 35.4     | 0.2                   | 0.0                   | 1.5                   | 1.2                  | 0.2                      |

**Table S2.** Distributions of suspended particulate matter (SPM), phytoplankton biomass (Chl*a*), particulate organic carbon (POC) and nitrogen (PN) concentrations, and molar POC:PN ratio (C:N), primary productivity (PP),  $\delta^{13}\text{C}_{\text{POM}}$  and  $\delta^{15}\text{N}_{\text{POM}}$  values in Gwangyang Bay during the study period.

| Date           | Station | SPM<br>(mg L <sup>-1</sup> ) | Chl <i>a</i><br>(µg L <sup>-1</sup> ) | POC<br>(µg L <sup>-1</sup> ) | PN<br>(µg L <sup>-1</sup> ) | C:N | PP<br>(mg C m <sup>-2</sup> d <sup>-1</sup> ) | $\delta^{13}\text{C}_{\text{POM}}$<br>(‰) | $\delta^{15}\text{N}_{\text{POM}}$<br>(‰) |
|----------------|---------|------------------------------|---------------------------------------|------------------------------|-----------------------------|-----|-----------------------------------------------|-------------------------------------------|-------------------------------------------|
| Spring<br>2017 | S1      | 5.3                          | 12.9                                  | 495.9                        | 87.4                        | 6.6 | 1999.3                                        | -25.6                                     | 7.3                                       |
|                | S2      | 12.0                         | 6.0                                   | 471.2                        | 81.2                        | 6.8 | 960.4                                         | -22.5                                     | 6.6                                       |
|                | S3      | 13.1                         | 5.0                                   | 453.7                        | 99.8                        | 5.3 | 974.8                                         | -22.5                                     | 3.5                                       |
|                | S4      | 18.2                         | 2.6                                   | 418.9                        | 96.4                        | 5.1 | 761.0                                         | -22.1                                     | 3.2                                       |
|                | S5      | 26.4                         | 3.9                                   | 437.9                        | 95.4                        | 5.4 | 544.6                                         | -21.3                                     | 6.5                                       |
|                | S6      | 20.3                         | 3.4                                   | 444.4                        | 96.0                        | 5.4 | 588.0                                         | -21.3                                     | 4.1                                       |
|                | S7      | 13.9                         | 4.8                                   | 444.2                        | 94.7                        | 5.5 | 567.7                                         | -21.1                                     | 4.0                                       |
|                | S8      | 18.9                         | 2.9                                   | 416.4                        | 96.6                        | 5.0 | 643.2                                         | -20.9                                     | 3.1                                       |
|                | S9      | 26.8                         | 3.9                                   | 419.1                        | 83.3                        | 5.9 | 658.8                                         | -20.8                                     | 3.0                                       |
| Summer<br>2017 | S1      | 2.2                          | 7.9                                   | 228.2                        | 47.8                        | 5.6 | 215.6                                         | -26.0                                     | 3.4                                       |
|                | S2      | 7.4                          | 2.9                                   | 254.7                        | 71.5                        | 4.2 | 258.9                                         | -25.2                                     | 4.6                                       |
|                | S3      | 7.5                          | 4.8                                   | 285.2                        | 57.8                        | 5.8 | 332.3                                         | -24.8                                     | 4.0                                       |
|                | S4      | 19.0                         | 4.5                                   | 363.4                        | 60.8                        | 7.0 | 667.2                                         | -24.2                                     | 8.7                                       |
|                | S5      | 18.3                         | 1.6                                   | 346.3                        | 72.3                        | 5.6 | 630.4                                         | -23.0                                     | 4.1                                       |
|                | S6      | 27.4                         | 3.1                                   | 354.6                        | 58.8                        | 7.0 | 717.8                                         | -23.0                                     | 5.4                                       |
|                | S7      | 25.0                         | 1.8                                   | 385.8                        | 57.3                        | 7.9 | 817.5                                         | -21.5                                     | 4.2                                       |
|                | S8      | 34.5                         | 2.9                                   | 414.5                        | 54.3                        | 8.9 | 910.4                                         | -20.7                                     | 4.1                                       |
|                | S9      | 20.0                         | 3.1                                   | 449.0                        | 63.0                        | 8.3 | 1012.1                                        | -19.6                                     | 3.9                                       |
| Fall<br>2017   | S1      | 4.7                          | 2.4                                   | 154.0                        | 64.2                        | 5.4 | 47.0                                          | -25.0                                     | 7.6                                       |
|                | S2      | 17.8                         | 3.1                                   | 198.6                        | 44.3                        | 4.1 | 68.3                                          | -24.3                                     | 4.1                                       |
|                | S3      | 10.6                         | 1.3                                   | 254.5                        | 55.4                        | 5.4 | 114.7                                         | -24.1                                     | 4.1                                       |
|                | S4      | 9.8                          | 3.2                                   | 202.4                        | 47.5                        | 5.0 | 119.7                                         | -23.3                                     | 4.5                                       |
|                | S5      | 18.6                         | 2.8                                   | 206.5                        | 43.5                        | 5.5 | 124.3                                         | -23.5                                     | 5.6                                       |
|                | S6      | 19.0                         | 2.6                                   | 200.0                        | 47.4                        | 4.9 | 133.8                                         | -22.7                                     | 4.1                                       |
|                | S7      | 26.2                         | 1.3                                   | 298.0                        | 58.0                        | 6.0 | 130.9                                         | -21.9                                     | 5.1                                       |
|                | S8      | 30.4                         | 0.7                                   | 221.0                        | 36.2                        | 7.1 | 156.1                                         | -19.7                                     | 7.5                                       |
|                | S9      | 24.1                         | 1.1                                   | 305.5                        | 45.3                        | 7.9 | 256.8                                         | -19.22                                    | 4.62                                      |
| Winter<br>2018 | S1      | 5.1                          | 0.4                                   | 482.0                        | 96.7                        | 5.8 | 203.4                                         | -26.0                                     | 7.0                                       |
|                | S2      | 8.4                          | 1.7                                   | 452.1                        | 84.6                        | 6.2 | 259.0                                         | -25.4                                     | 5.9                                       |
|                | S3      | 9.6                          | 1.8                                   | 446.3                        | 87.3                        | 6.0 | 348.3                                         | -24.5                                     | 7.3                                       |
|                | S4      | 8.2                          | 1.4                                   | 442.2                        | 95.3                        | 5.4 | 339.6                                         | -24.2                                     | 9.6                                       |
|                | S5      | 11.6                         | 2.2                                   | 430.2                        | 86.3                        | 5.8 | 579.6                                         | -23.7                                     | 7.9                                       |
|                | S6      | 19.1                         | 2.2                                   | 487.5                        | 97.0                        | 5.9 | 546.2                                         | -23.3                                     | 7.6                                       |
|                | S7      | 22.2                         | 2.6                                   | 433.2                        | 83.4                        | 6.1 | 558.8                                         | -23.2                                     | 7.6                                       |
|                | S8      | 22.4                         | 1.4                                   | 420.0                        | 65.9                        | 7.4 | 643.3                                         | -22.9                                     | 8.3                                       |
|                | S9      | 28.8                         | 1.4                                   | 426.5                        | 85.6                        | 5.8 | 645.0                                         | -22.2                                     | 7.5                                       |

**Table S3.** The concentrations of biochemical compounds (carbohydrates: CHO, proteins: PRT, lipids: LIP), biopolymeric carbon (BPC), their ratios (PRT:CHO, CHO:LIP, and POC:Chl $a$ ) of seston at nine selected stations in Gwangyang Bay during the study period.

| Date               | Station | CHO<br>( $\mu\text{g L}^{-1}$ ) | PRT<br>( $\mu\text{g L}^{-1}$ ) | LIP<br>( $\mu\text{g L}^{-1}$ ) | BPC<br>( $\mu\text{g CL}^{-1}$ ) | PRT:CH<br>O | CHO:LIP | POC:Chl $a$ |
|--------------------|---------|---------------------------------|---------------------------------|---------------------------------|----------------------------------|-------------|---------|-------------|
| Spring<br>2017     | S1      | 149.2                           | 421.4                           | 163.2                           | 392.1                            | 2.8         | 0.9     | 38.4        |
|                    | S2      | 150.7                           | 333.2                           | 107.3                           | 309.5                            | 2.2         | 1.4     | 78.5        |
|                    | S3      | 183.3                           | 107.9                           | 106.9                           | 211.3                            | 0.6         | 1.7     | 90.9        |
|                    | S4      | 179.9                           | 230.1                           | 97.9                            | 276.6                            | 1.3         | 1.6     | 163.8       |
|                    | S5      | 274.0                           | 253.5                           | 126.4                           | 316.2                            | 0.9         | 2.9     | 111.1       |
|                    | S6      | 294.6                           | 220.5                           | 94.5                            | 331.3                            | 0.7         | 2.3     | 131.0       |
|                    | S7      | 317.4                           | 160                             | 115.2                           | 291.4                            | 0.5         | 3.2     | 92.1        |
|                    | S8      | 235.4                           | 190.8                           | 121.6                           | 286.5                            | 0.8         | 1.9     | 141.7       |
|                    | S9      | 304.7                           | 178.0                           | 88.9                            | 288.3                            | 0.6         | 3.4     | 107.2       |
| Summe<br>r<br>2017 | S1      | 242.9                           | 237.5                           | 99.0                            | 297.4                            | 1.0         | 2.5     | 29.0        |
|                    | S2      | 136.1                           | 284.3                           | 94.1                            | 269.3                            | 2.1         | 1.4     | 87.2        |
|                    | S3      | 340.3                           | 337.4                           | 118.9                           | 405.1                            | 2.1         | 2.9     | 59.5        |
|                    | S4      | 471.4                           | 500.0                           | 213.2                           | 611.4                            | 1.1         | 2.2     | 80.5        |
|                    | S5      | 741.9                           | 107.9                           | 68.6                            | 435.8                            | 0.1         | 10.8    | 211.2       |
|                    | S6      | 750.5                           | 425.6                           | 183.1                           | 678.7                            | 0.6         | 4.1     | 112.6       |
|                    | S7      | 740.8                           | 382.0                           | 247.7                           | 697.8                            | 0.5         | 3.0     | 211.7       |
|                    | S8      | 1162.6                          | 338.5                           | 164.7                           | 807.7                            | 0.3         | 7.1     | 141.0       |
|                    | S9      | 541.5                           | 238.6                           | 186.5                           | 493.5                            | 0.4         | 2.9     | 142.9       |
| Fall<br>2017       | S1      | 439.2                           | 112.2                           | 84.4                            | 312.8                            | 0.3         | 5.2     | 65.2        |
|                    | S2      | 528.4                           | 221.6                           | 119.7                           | 432.4                            | 0.4         | 4.4     | 63.1        |
|                    | S3      | 121.5                           | 45.2                            | 61.9                            | 120.6                            | 0.4         | 2.0     | 201.5       |
|                    | S4      | 86.3                            | 85.6                            | 79.1                            | 137.0                            | 1.0         | 1.1     | 64.3        |
|                    | S5      | 69.1                            | 47.4                            | 64.5                            | 99.9                             | 0.7         | 1.1     | 74.0        |
|                    | S6      | 142.9                           | 67.5                            | 112.5                           | 176.8                            | 0.5         | 1.3     | 78.0        |
|                    | S7      | 308.8                           | 55.9                            | 141.5                           | 266                              | 0.2         | 2.2     | 222.4       |
|                    | S8      | 555.3                           | 53.7                            | 185                             | 406.2                            | 0.1         | 3.0     | 306.3       |
|                    | S9      | 130.5                           | 89.9                            | 118.2                           | 186.4                            | 0.7         | 1.1     | 275.6       |
| Winter<br>2018     | S1      | 686.1                           | 86.7                            | 92.3                            | 416.7                            | 0.1         | 7.4     | 1154.4      |
|                    | S2      | 288.6                           | 69.7                            | 67.9                            | 212.3                            | 0.2         | 4.3     | 262.1       |
|                    | S3      | 244.4                           | 83.5                            | 107.7                           | 227.1                            | 0.3         | 2.3     | 254.0       |
|                    | S4      | 233.1                           | 93.0                            | 94.1                            | 217.3                            | 0.4         | 2.5     | 312.3       |
|                    | S5      | 111.0                           | 152.5                           | 107.3                           | 201.3                            | 1.4         | 1.0     | 193.3       |
|                    | S6      | 118.5                           | 201.4                           | 102.0                           | 225.4                            | 1.7         | 1.2     | 220.0       |
|                    | S7      | 157.8                           | 280.0                           | 106.5                           | 285.6                            | 1.8         | 1.5     | 168.5       |
|                    | S8      | 72.0                            | 126.0                           | 79.1                            | 150.8                            | 1.8         | 0.9     | 290.5       |
|                    | S9      | 55.6                            | 126.0                           | 165.9                           | 204.2                            | 2.3         | 0.3     | 312.3       |

**Table S4.** Output marker pigment:chlorophyll *a* ratio for phytoplankton groups as calculated by CHEMTAX in each cluster in Gwangyang Bay based on the self-organizing map. DIAT, diatoms; DINO, dinoflagellates; CRYP, cryptophytes; PELA, pelagophytes; PRYM, Prymnesiophytes; CHLO, chlorophytes; CYAN, cyanobacteria; PRAS, prasinophytes.

| Clusters    | Station | DIAT | DINO | CRYP | PELA | PRYM | CHLO | CYAN | PRAS |
|-------------|---------|------|------|------|------|------|------|------|------|
| Cluster I   | A1      | 4.2  | 0.3  | 0.4  | 0.3  | 0.0  | 2.6  | 0.0  | 0.0  |
|             | A2      | 1.6  | 0.0  | 0.8  | 0.1  | 0.0  | 0.3  | 0.0  | 0.0  |
|             | A3      | 3.5  | 0.6  | 0.2  | 0.1  | 0.0  | 0.3  | 0.0  | 0.0  |
|             | A4      | 3.1  | 1.2  | 0.0  | 0.1  | 0.0  | 0.1  | 0.0  | 0.1  |
|             | N1      | 0.2  | 0.0  | 1.9  | 0.0  | 0.0  | 0.2  | 0.0  | 0.1  |
|             | N2      | 0.5  | 0.0  | 2.4  | 0.0  | 0.0  | 0.1  | 0.0  | 0.1  |
| Cluster II  | N3      | 0.5  | 0.0  | 0.5  | 0.0  | 0.0  | 0.0  | 0.2  | 0.0  |
|             | N4      | 1.7  | 0.1  | 1.0  | 0.0  | 0.0  | 0.0  | 0.1  | 0.2  |
|             | N5      | 2.4  | 0.1  | 0.0  | 0.1  | 0.0  | 0.0  | 0.0  | 0.1  |
|             | N6      | 2.2  | 0.1  | 0.1  | 0.0  | 0.0  | 0.0  | 0.0  | 0.0  |
|             | N7      | 1.2  | 0.1  | 0.0  | 0.0  | 0.0  | 0.0  | 0.0  | 0.0  |
|             | N8      | 0.6  | 0.0  | 0.0  | 0.0  | 0.0  | 0.0  | 0.0  | 0.0  |
|             | N9      | 1.0  | 0.0  | 0.0  | 0.0  | 0.0  | 0.0  | 0.0  | 0.0  |
| Cluster III | F1      | 0.3  | 0.0  | 0.0  | 0.0  | 0.0  | 0.0  | 0.0  | 0.0  |
|             | F2      | 0.7  | 0.0  | 0.8  | 0.0  | 0.0  | 0.1  | 0.1  | 0.1  |
|             | F3      | 0.7  | 0.0  | 0.6  | 0.0  | 0.0  | 0.0  | 0.0  | 0.4  |
|             | F4      | 1.0  | 0.0  | 0.1  | 0.0  | 0.0  | 0.0  | 0.0  | 0.3  |
|             | F5      | 1.8  | 0.0  | 0.2  | 0.0  | 0.0  | 0.0  | 0.0  | 0.2  |
|             | F6      | 1.7  | 0.0  | 0.2  | 0.0  | 0.0  | 0.1  | 0.0  | 0.2  |
|             | F7      | 2.0  | 0.0  | 0.3  | 0.1  | 0.0  | 0.1  | 0.0  | 0.1  |
|             | F8      | 1.2  | 0.0  | 0.1  | 0.0  | 0.0  | 0.0  | 0.0  | 0.1  |
|             | F9      | 0.8  | 0.0  | 0.2  | 0.1  | 0.0  | 0.0  | 0.0  | 0.2  |
| Cluster IV  | M1      | 6.0  | 0.7  | 4.6  | 0.2  | 0.1  | 0.4  | 0.2  | 0.9  |
|             | M2      | 3.5  | 1.0  | 0.4  | 0.6  | 0.0  | 0.1  | 0.1  | 0.4  |
|             | M3      | 3.2  | 0.4  | 1.1  | 0.0  | 0.0  | 0.0  | 0.0  | 0.2  |
|             | M4      | 0.9  | 0.0  | 1.1  | 0.0  | 0.0  | 0.0  | 0.0  | 0.5  |
|             | M5      | 2.7  | 0.9  | 0.1  | 0.1  | 0.0  | 0.1  | 0.0  | 0.0  |
|             | M6      | 1.8  | 0.0  | 1.2  | 0.0  | 0.0  | 0.0  | 0.0  | 0.3  |
|             | M7      | 2.3  | 0.0  | 1.6  | 0.1  | 0.0  | 0.1  | 0.0  | 0.6  |
|             | M8      | 1.5  | 0.0  | 0.9  | 0.1  | 0.0  | 0.0  | 0.0  | 0.4  |
|             | M9      | 1.6  | 0.0  | 1.8  | 0.0  | 0.0  | 0.1  | 0.1  | 0.4  |
|             | A5      | 1.1  | 0.0  | 0.1  | 0.1  | 0.0  | 0.0  | 0.0  | 0.3  |
|             | A6      | 2.3  | 0.6  | 0.1  | 0.1  | 0.0  | 0.0  | 0.0  | 0.0  |
|             | A7      | 1.3  | 0.3  | 0.1  | 0.0  | 0.0  | 0.0  | 0.0  | 0.0  |
|             | A8      | 2.3  | 0.4  | 0.1  | 0.1  | 0.0  | 0.0  | 0.0  | 0.1  |
|             | A9      | 2.3  | 0.5  | 0.2  | 0.1  | 0.0  | 0.0  | 0.0  | 0.1  |

**Table S5.** The generalized additive models (GAMs) analysis of phytoplankton community composition and biochemical components of seston measured in Gwangyang Bay. Bold values indicate that correlation is significant at  $p < 0.05$ . Microphytoplankton (diatoms and dinoflagellated); Nanophytoplankton, (cryptophytes, pelagophytes and prymnesiophytes); Picophytoplankton (chlorophytes, cyanobacteria and prasinophytes).

| Y       | Selectedmodel      | AIC | Deviance explained (%) | F-test   |        |      |              |
|---------|--------------------|-----|------------------------|----------|--------|------|--------------|
|         |                    |     |                        | Terms    | df/edf | F    | P-value      |
| CHO     | Y~s(Micro)         | 500 | 39.4                   | s(Micro) | 7.5    | 1.6  | 0.134        |
| PRT     | Y~s(Micro)         | 433 | 43                     | s(Micro) | 1.0    | 25.6 | <b>0.000</b> |
| LIP     | Y~s(Micro)+s(Pico) | 370 | 32.2                   | s(Micro) | 1.0    | 6.2  | <b>0.019</b> |
|         |                    |     |                        | s(Pico)  | 2.5    | 2.9  | <b>0.044</b> |
| PRT:CHO | Y~s(Micro)         | 71  | 41.7                   | s(Micro) | 3.8    | 4.2  | <b>0.000</b> |
| CHO:LIP | Y~s(Nano)          | 161 | 7.9                    | s(Nano)  | 2.5    | 0.5  | 0.606        |

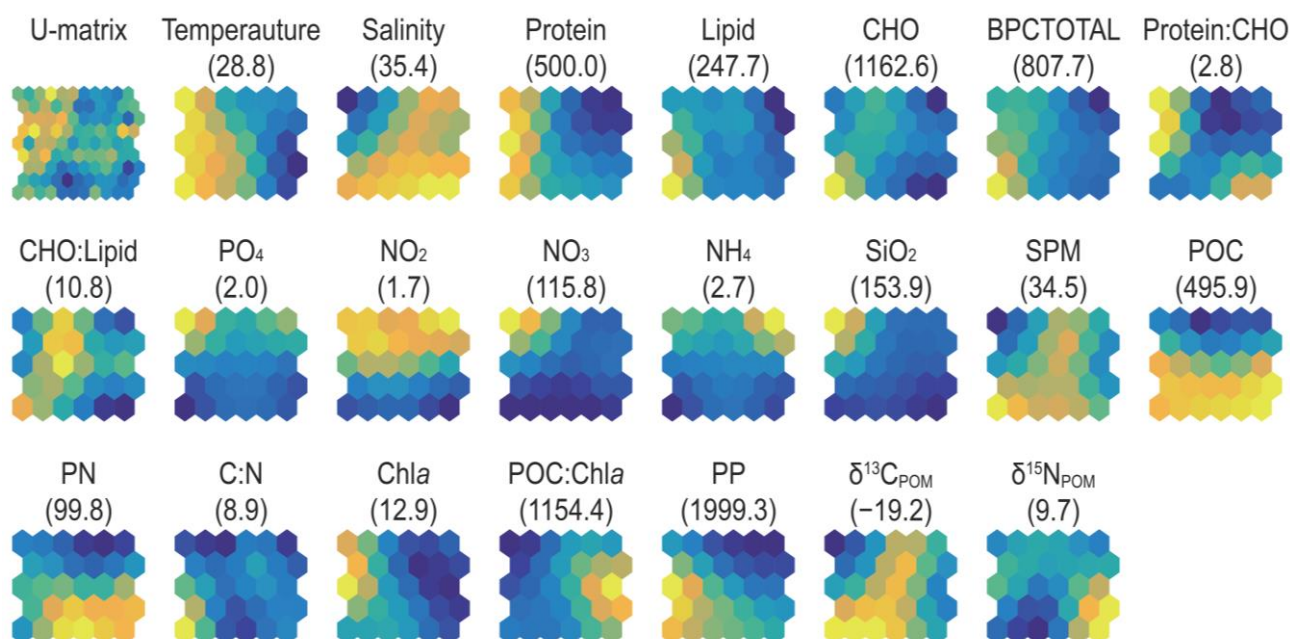

**Supplementary Figure S1.** Visualization of physical and biogeochemical variables on trained Self Organizing Map units.
